# Supplementary material for: Long-term anabolic androgenic steroid use is associated with deviant brain aging
Source: bioRxiv or medRxiv preprint supplement (doi:10.1101/2020.08.19.20177832), 2020-11-30
Supplement: Supplementary file [file 2020.08.19.20177832-1.pdf]

## Supplementary Material

### Methods

**Table S1.** Age distribution and links to websites of the cohorts included in the training sample.

| Sample    | Source                                                                                                                  | Min   | Max   | Mean  | SD    |
|-----------|-------------------------------------------------------------------------------------------------------------------------|-------|-------|-------|-------|
| CAMCAN    | <a href="https://camcan-archive.mrc-cbu.cam.ac.uk/dataaccess/">https://camcan-archive.mrc-cbu.cam.ac.uk/dataaccess/</a> | 18    | 87    | 54.26 | 18.36 |
| DLBS      | <a href="http://fcon_1000.projects.nitrc.org/">http://fcon_1000.projects.nitrc.org/</a>                                 | 20.57 | 88.14 | 53.72 | 20.24 |
| ds000222  | <a href="https://openfmri.org/">https://openfmri.org/</a>                                                               | 23    | 73    | 47.73 | 20.01 |
| HCP       | <a href="https://www.humanconnectome.org/">https://www.humanconnectome.org/</a>                                         | 22    | 37    | 27.87 | 3.59  |
| IXI       | <a href="http://brain-development.org/ixi-dataset/32/">http://brain-development.org/ixi-dataset/32/</a>                 | 20.07 | 86.2  | 46.68 | 16.37 |
| OASIS     | <a href="http://www.oasis-brains.org/">http://www.oasis-brains.org/</a>                                                 | 18    | 90    | 48.23 | 24.68 |
| SALD      | <a href="http://fcon_1000.projects.nitrc.org/">http://fcon_1000.projects.nitrc.org/</a>                                 | 20    | 80    | 45.3  | 17.41 |
| STROKEMRI | Local sample (L.T.W.)                                                                                                   | 20    | 92    | 63.94 | 14.43 |

### Results

**Table S2.** Pearson correlation between estimated brain age and chronological age within the training sample, and the calculated mean absolute error (MAE) and root mean squared error (RMSE) for the different models.

| Models             | <i>r</i> | rmse  | MAE  |
|--------------------|----------|-------|------|
| <i>Fullbrain</i>   | .93      | 7.57  | 5.76 |
| <i>Occipital</i>   | .76      | 12.94 | 1.05 |
| <i>Temporal</i>    | .85      | 1.49  | 8.08 |
| <i>Frontal</i>     | .88      | 9.55  | 7.19 |
| <i>Parietal</i>    | .85      | 1.43  | 7.92 |
| <i>Cingulate</i>   | .78      | 12.61 | 9.79 |
| <i>Insula</i>      | .79      | 12.22 | 9.49 |
| <i>Subcortical</i> | .90      | 8.54  | 6.46 |

**Table S3.** Differences in regional brain age estimates between AAS-users with >2 years of AAS use and WLC adjusted for age and age<sup>2</sup>. Mean values are corrected brain age gap and are presented as estimated marginal means

|                      | WLC (n=102) |           | AAS users (n=123) |           |          |             |            |                |
|----------------------|-------------|-----------|-------------------|-----------|----------|-------------|------------|----------------|
| <b>Brain Age Gap</b> | <b>Mean</b> | <b>SE</b> | <b>Mean</b>       | <b>SE</b> | <b>F</b> | <b>Sig.</b> | <b>FDR</b> | <b>P Eta S</b> |
| <i>Fullbrain</i>     | -1.96       | .69       | 1.55              | .62       | 14.282   | <.001       | <.001      | .061           |
| <i>Occipital</i>     | -1.50       | .89       | 1.37              | .81       | 5.613    | .019        | .022       | .025           |
| <i>Temporal</i>      | -1.36       | .78       | 1.16              | .71       | 5.729    | .018        | .029       | .025           |
| <i>Frontal</i>       | -2.26       | .88       | 1.76              | .80       | 11.358   | .001        | .004       | .049           |
| <i>Parietal</i>      | -1.27       | .77       | 1.22              | .70       | 5.676    | .018        | .024       | .025           |
| <i>Cingulate</i>     | -1.63       | .90       | 1.43              | .82       | 6.343    | .012        | .024       | .028           |
| <i>Insula</i>        | -1.55       | .73       | 1.17              | .66       | 7.63     | .006        | .016       | .033           |
| <i>Subcortical</i>   | -1.07       | .80       | .93               | .73       | 3.447    | .065        | .065       | .015           |

**Table S4.** Differences in regional brain age estimates between AAS-users and weightlifting controls when adjusting for age, age<sup>2</sup>, general cognitive abilities, drug and alcohol use and depression. Mean values are corrected brain age gap presented as estimated marginal means. Note that this model is based upon a smaller sample size as the clinical variables were not available from all participants.

|                      | WLC (n=89)  |           | AAS users (n=89) |           |          |             |            |                |
|----------------------|-------------|-----------|------------------|-----------|----------|-------------|------------|----------------|
| <b>Brain Age Gap</b> | <b>Mean</b> | <b>SE</b> | <b>Mean</b>      | <b>SE</b> | <b>F</b> | <b>Sig.</b> | <b>FDR</b> | <b>P Eta S</b> |
| <i>Fullbrain</i>     | -2.07       | .79       | 1.64             | .79       | 9.363    | .003        | .024       | .052           |
| <i>Occipital</i>     | -.91        | 1.09      | .10              | 1.09      | .358     | .550        | .550       | .002           |
| <i>Temporal</i>      | -1.31       | .95       | .58              | .95       | 1.673    | .198        | .396       | .01            |
| <i>Frontal</i>       | -2.17       | 1.03      | 1.11             | 1.03      | 4.235    | .041        | .109       | .024           |
| <i>Parietal</i>      | -1.07       | .87       | -.24             | .87       | .382     | .537        | .610       | .002           |
| <i>Cingulate</i>     | -1.73       | 1.05      | .24              | 1.05      | 1.474    | .226        | .362       | .009           |
| <i>Insula</i>        | -1.15       | .85       | .02              | .85       | .803     | .372        | .614       | .005           |
| <i>Subcortical</i>   | -1.06       | .95       | 2.05             | .95       | 4.550    | .034        | .136       | .026           |
